# Supplementary material for: Decreased energy barrier and improved interfacial kinetics for efficient photoelectrochemical water splitting using La-engineered LDHs coupled with BiVO4
Source: Royal Society of Chemistry journal article supplement (doi:10.1039/d4qi02568g), 2025-01-01
Supplement: d4qi02568g1.pdf [file d4qi02568g1.pdf]

## Supporting Information

### 1. Experimental

#### 1.1. Preparation of materials

Bismuth nitrate pentahydrate [ $\text{Bi}(\text{NO}_3)_3 \cdot 5\text{H}_2\text{O}$ , 99.0%], anhydrous sodium sulfate ( $\text{Na}_2\text{SO}_4$ , 99.5%), dimethyl sulfoxide ( $\text{C}_2\text{H}_6\text{SO}$ , 99.8%), vanadyl acetylacetonate ( $\text{VO}(\text{acac})_2$ , 98%), potassium iodide (KI, AR), p-benzoquinone ( $\text{C}_6\text{H}_4\text{O}_2$ , 99%), ammonium fluoride ( $\text{NH}_4\text{F}$ , 98%), iron nitrate nonahydrate ( $\text{Fe}(\text{NO}_3)_3 \cdot 9\text{H}_2\text{O}$ , AR), hexahydrate Cobalt nitrate ( $\text{Co}(\text{NO}_3)_2 \cdot 6\text{H}_2\text{O}$ , AR), lanthanum nitrate hexahydrate ( $\text{La}(\text{NO}_3)_3 \cdot 6\text{H}_2\text{O}$ , AR) were purchased from Aladdin Company, absolute ethanol ( $\text{C}_2\text{H}_6\text{O}$ , AR), urea ( $\text{CO}(\text{NH}_2)_2$ , AR), sodium sulfite ( $\text{Na}_2\text{SO}_3$ , AR), sodium hydroxide ( $\text{NaOH}$ , AR) were purchased from Sinopharm Chemical Reagent Co., Ltd., and nitric acid ( $\text{HNO}_3$ , AR) was purchased from Nanjing Chemical Reagent Co., Ltd. In the experiments, all chemicals were used directly without any further purification.

#### 1.2. Preparation of composite photoanodes

##### 1.2.1. Preparation of $\text{BiVO}_4$ photoanodes

The  $\text{Bi}(\text{NO}_3)_3$  solution was prepared by dissolving 0.97 g of  $\text{Bi}(\text{NO}_3)_3 \cdot 5\text{H}_2\text{O}$  in 50 mL of KI solution, which contained 3.32 g of KI. The pH of solution was adjusted to  $\sim 1.7$  by adding  $\text{HNO}_3$ . This solution was mixed with 20 mL of alcohol containing 0.49 g p-benzoquinone. A typical three-electrode system was employed for electrodeposition. A piece of fluorine-doped tin oxide (FTO) glass was used as the working electrode, an Ag/AgCl electrode (filled with  $3.3 \text{ mol L}^{-1}$  KCl) served as the reference electrode, and platinum foil was employed as the counter electrode.

Electrochemical workstation (CHI-660E, Shanghai Chenhua, China) was used for sample preparation and performance test. Electrodeposition was performed at -0.1 V (vs. Ag/AgCl) for 300s, corresponding to the amount of deposit charge was  $0.3 \text{ C cm}^{-2}$ . The obtained BiOI precursor was washed by DI water and dried in air naturally. The following is 100  $\mu\text{L}$  of dimethyl sulfoxide solution containing 0.2 M VO(acac)<sub>2</sub> was dropped on the surface of BiOI electrode ( $1 \times 1 \text{ cm}$ ). Then the electrode was heated in a muffle furnace at 450 °C (ramping rate of  $2 \text{ }^\circ\text{C min}^{-1}$ ) for 2 h. Excess V<sub>2</sub>O<sub>5</sub> at the surface of BiVO<sub>4</sub> was removed by immersing the electrode in 1 M NaOH for 0.5 h with slow stirring. Finally, the product BiVO<sub>4</sub> electrode was washed with DI water and dried in air.

### **1.2.2. Preparation of Co<sub>2</sub>Fe<sub>1</sub>-LDHs/BiVO<sub>4</sub> composite photoanodes**

Composite photoanodes were prepared using a simple hydrothermal method. 0.1 mmol Co(NO<sub>3</sub>)<sub>2</sub>·6 H<sub>2</sub>O, 0.05 mmol Fe(NO<sub>3</sub>)<sub>3</sub>·9H<sub>2</sub>O, 1.5 mmol urea, 0.375 mmol NH<sub>4</sub>F were dissolved in 50 mL deionized solution, and stirred vigorously for 30 minutes to form a uniform metal salt solution. 15 mL of precursor solution was placed into a 25 mL Teflon-lined autoclave, and a piece of BiVO<sub>4</sub> electrode was put into it while the BiVO<sub>4</sub> side was facing down. The mixture was heated at 90 °C for 4 h, and the formed composite was thoroughly washed with DI water and dried at room temperature before using.

### **1.2.3. Preparation of Co<sub>2</sub>Fe<sub>x</sub>La<sub>1-x</sub>-LDHs/BiVO<sub>4</sub> composite photoanode**

In the preparation process of Co<sub>2</sub>Fe<sub>x</sub>La<sub>1-x</sub>-LDHs, 0.1 mmol Co(NO<sub>3</sub>)<sub>2</sub>·6 H<sub>2</sub>O, 0.01 mmol Fe(NO<sub>3</sub>)<sub>3</sub>·9H<sub>2</sub>O, 0.04 mmol La(NO<sub>3</sub>)<sub>3</sub>·6 H<sub>2</sub>O, 1.2 mmol urea, 0.075 mmol NH<sub>4</sub>F

were dissolved in 50 mL deionized solution ( $\text{Co}^{2+}:[\text{Fe}^{3+}+\text{La}^{3+}]=2$ ), and stirred vigorously for 30 minutes to form a uniform metal salt solution. 15 mL of precursor solution was placed into a 25 mL Teflon-lined autoclave, and a piece of  $\text{BiVO}_4$  electrode was put into it while the  $\text{BiVO}_4$  side was facing down. The mixture was heated at 90 °C for 4 h, and the formed composite was thoroughly washed with DI water and dried at room temperature before using. The final product was named as  $\text{Co}_2\text{Fe}_{0.2}\text{La}_{0.8}$ -LDH.

In order to compare the effect of adding La on the OER, this prepared process controlled the ratio of Fe and La in  $\text{Co}_2\text{Fe}_x\text{La}_{1-x}$ -LDHs by adjusting the amount of  $\text{Fe}(\text{NO}_3)_3 \cdot 9\text{H}_2\text{O}$  and  $\text{La}(\text{NO}_3)_3 \cdot 6\text{H}_2\text{O}$ . Maintaining the total moles of  $\text{Fe}^{3+}$  and  $\text{La}^{3+}$  at 0.05 mmol, change the addition amount of  $\text{Fe}(\text{NO}_3)_3 \cdot 9\text{H}_2\text{O}$  and  $\text{La}(\text{NO}_3)_3 \cdot 6\text{H}_2\text{O}$ , and the products were named as  $\text{Co}_2\text{Fe}_{0.1}\text{La}_{0.9}$ -LDH,  $\text{Co}_2\text{Fe}_{0.5}\text{La}_{0.5}$ -LDH and  $\text{Co}_2\text{Fe}_{0.8}\text{La}_{0.2}$ -LDH.

### 1.3. Characterizations

The morphology and structure of as-prepared photoanodes were explored by scanning electron microscopy (SEM, Hitachi S-4700) and transmission electron microscopy (TEM, Hitachi 7700), respectively. The distribution of element of as-prepared photoanodes were characterized by the energy-dispersive spectroscopy (EDS, JEOL-6701F). The crystal structure of as-prepared photoanodes were studied on X-ray diffractometer (XRD, D/max-2500 VB2+/PC equipped with Cu-K $\alpha$  radiation ( $\lambda = 0.15406$  nm)). The microstructure of as-prepared photoanodes were explored by the High-resolution transmission electron microscopy (HRTEM, Hitachi H-9500). The

chemical states and composition of as-prepared photoanodes were explored by X-ray photoelectron spectroscopy (XPS, Thermo ESCALAB250). The UV-vis diffuse spectra of all photoanodes were performed on the UV-8000S. Electron paramagnetic resonance (EPR) spectra of as-prepared samples were characterized by a low temperature (77K) pulse electron paramagnetic resonance spectrometer. Electron spin resonance (ESR) signals of spin-trapped radicals were detected on a Bruker model ESR JESFA200 spectrometer using spin-trap reagent DMPO. For the operando ESR characterization, 0.5 M sodium sulfate, a platinum electrode, and Ag/AgCl electrode were respectively employed as electrolyte, reference electrode, and counter electrode. After reaction, 30  $\mu$ L electrolyte was mixed with 30  $\mu$ L DMPO solution. The solution was drawn into a capillary and placed in a quartz tube, which was then inserted into the EPR resonant cavity to capture free radicals for testing. Photocatalytic H<sub>2</sub>-evolution activities from water-splitting of the samples were evaluated by CEL-SPH2N photocatalytic water splitting into H<sub>2</sub> system. 0.1 g of the photocatalyst was dispersed in the mixed solution containing 90 mL of deionized water and 10 mL of methanol (as sacrificial agent), and put in a closed quartz reactor. A 300 W Xe lamp equipped with a cutoff filter of 420 nm was used to provide visible light irradiation (> 420 nm). Before reaction, the reaction system was evacuated to ensure complete removal of air, O<sub>2</sub> and CO<sub>2</sub> gases in the solution by aeration of N<sub>2</sub>. Then turning on the light kept photocatalytic water-splitting reaction for 6 h. Evolved-H<sub>2</sub> was analyzed by gas chromatography (Shanghai FanWei Science and Technology Ltd. GC9860, 5A column, TCD, and Ar carrier).

#### 1.4. Photoelectrochemical measurements

All PEC properties measurements were tested on a Zahner electrochemical workstation. The light source is a Xe 300 W lamp with AM 1.5 G filter and the light intensity was calibrated to 100 mW cm<sup>-2</sup> by a photometer (International Light ILT 1400A). 0.5 M Na<sub>2</sub>SO<sub>4</sub> (pH =7) with or without 0.5 M Na<sub>2</sub>SO<sub>3</sub> solution as hole scavenger was used as the electrolyte. As-prepared photoanodes were illuminated from the non-conductive side of FTO with an irradiation area of 1.0 cm<sup>2</sup>. The linear sweep voltammetry (LSV) plots were scanned on the Zahner electrochemical workstation with a sweep potential from -0.6 to 0.8 V (vs. Ag/AgCl) and a scanning rate of 10 mV s<sup>-1</sup>. According to Nernst equation (Eq. 1), the potential vs. RHE can be calculated from the potential vs. Ag/AgCl.

$$E_{RHE} = E_{Ag/AgCl} + 0.0591 \times pH + E_{Ag/AgCl}^0 \quad (1)$$

$E_{RHE}$  represents the converted potential versus RHE, while  $E_{Ag/AgCl}$  refers to the obtained potential versus Ag/AgCl electrode. The normal potential of Ag/AgCl electrode ( $E_{Ag/AgCl}^0$ ) is 0.1976 V at 25°C. Both surface charge injection efficiency ( $\eta_{surface}$ ) and charge separation efficiency ( $\eta_{sep}$ ) can be calculated according to Eqs. (2–3).

$$\eta_{Surface}(\%) = \frac{J_{water}}{J_{Na2SO3}} \quad (2)$$

$$\eta_{Sep}(\%) = \frac{J_{Na2SO3}}{J_{abs}} \quad (3)$$

Where  $J_{water}$  and  $J_{Na2SO3}$  are photocurrent densities of the water oxidation and sulfite oxidation, respectively.  $J_{abs}$  represents the theoretical photocurrent density, which is based on the assumption of that the photons absorbed are completely converted

to the current. In addition, applied bias photon to current efficiency (ABPE) can be calculated according to the LSV curves by Eq. (4):

$$ABPE(\%) = \frac{J \times (1.23 - V_{bias})}{PAM1.5} \times 100\% \quad (4)$$

Where  $J$  is the photocurrent density ( $\text{mA cm}^{-2}$ ) indicated by LSV curves.  $V_{bias}$  represents the applied bias versus RHE (V), and PAM 1.5 is  $100 \text{ mV cm}^{-2}$ . The incident photon-to-current conversion efficiency (IPCE) is calculated based on the determination of photocurrent densities at specific wavelengths using the light source with a monochromator (Eq. 5):

$$IPCE(\%) = \frac{1240 \times J}{\lambda \times P_{light}} \times 100\% \quad (5)$$

Where  $P_{light}$  and  $J$  represent the light power density and photocurrent density at a specific wavelength, respectively. And  $\lambda$  refers to incident wavelength. In addition, within the frequency ranges of 0.1–100000 Hz, both photoelectrochemical impedance spectroscopy under AM 1.5 G illumination and electrochemical impedance spectroscopy (EIS) in dark condition were conducted with an AC voltage amplitude of 5mV at the open-circuit potential. Mott-Schottky (MS) measurements were performed at different frequencies (1000 Hz and 500 Hz) using  $\text{Na}_2\text{SO}_4$  (0.5 M, pH = 9.33) as the electrolyte solution. According to Eq. (6), the charge carrier densities ( $N_d$ ) can be calculated based on the MS curves measured at 1000 Hz in the dark.

$$N_d = [d(1/C^2)/dV]^{-1} \quad (6)$$

### 1.5. Computational details

We have employed the Vienna Ab Initio Package (VASP)[1, 2] to perform all the

spin-polarized density functional theory (DFT) calculations within the generalized gradient approximation (GGA) in the PBE[3] formulation. We have chosen the projected augmented wave (PAW) potentials[4, 5] to describe the ionic cores and take valence electrons into account using a plane wave basis set with a kinetic energy cutoff of 450 eV. Partial occupancies of the Kohn–Sham orbitals were allowed using the Methfessel-Paxton smearing method and a width of 0.10 eV. The electronic energy was considered self-consistent when the energy change was smaller than  $10^{-6}$  eV. A geometry optimization was considered convergent when the residual forces were smaller than 0.05 eV/Å. The free energy of a gas phase molecule or an adsorbate on the surface was calculated by the equation  $G = E + \text{ZPE} - TS$ , where E is the total energy, ZPE is the zero-point energy, T is the temperature in kelvin (298.15 K is set here), and S is the entropy. The transition state of an elementary reaction step was located by the nudged elastic band (NEB) method[6]. In the NEB method, the path between the reactant(s) and product(s) was discretized into a series of structural images. The intermediate images were relaxed until the perpendicular forces were smaller than 0.05 eV/Å.

The four-electron pathway of OER occurs in alkaline aqueous solution was generally reported to proceed according to the following steps.

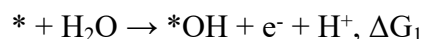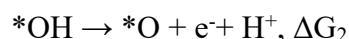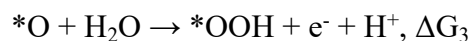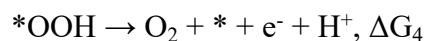

Where “\*” represents the active site on the catalyst, and \*O, \*OH, and \*OOH are the intermediates of adsorption. The Gibbs free energy of OER process can be calculated based on adsorption energy of intermediate products ( $E_{\text{abs}}$ ), zero-point energy of reaction ( $\Delta E_{\text{ZPE}}$ ) and entropy ( $\Delta S$ ). Herein,  $\Delta U$  is the energy difference between 0 K and temperature  $t$ .

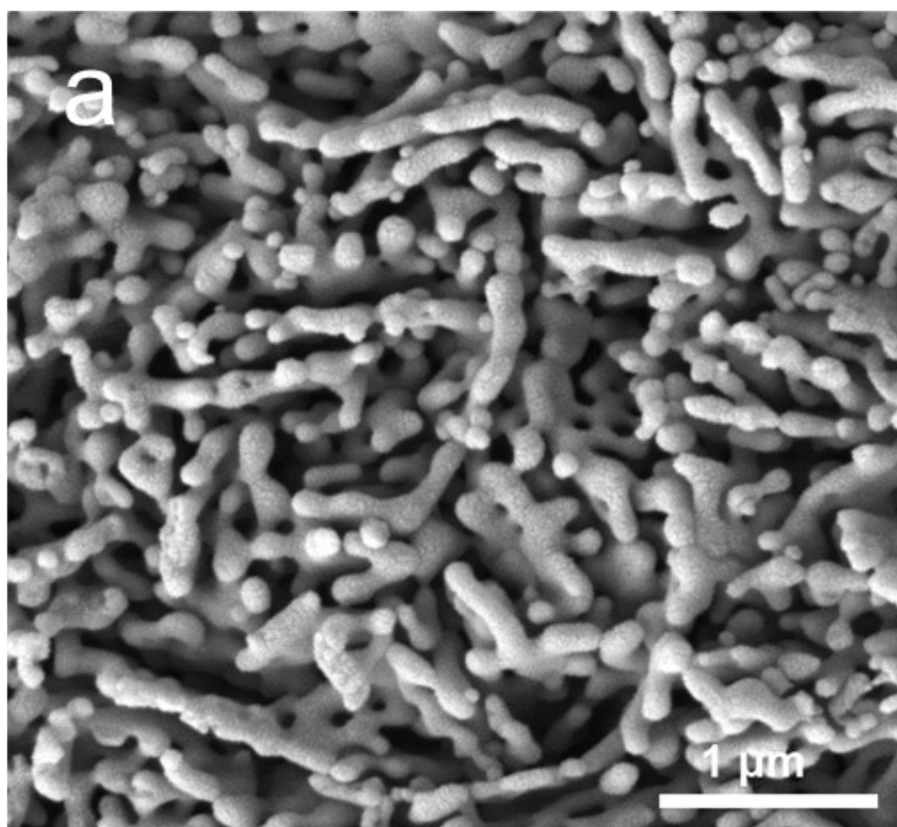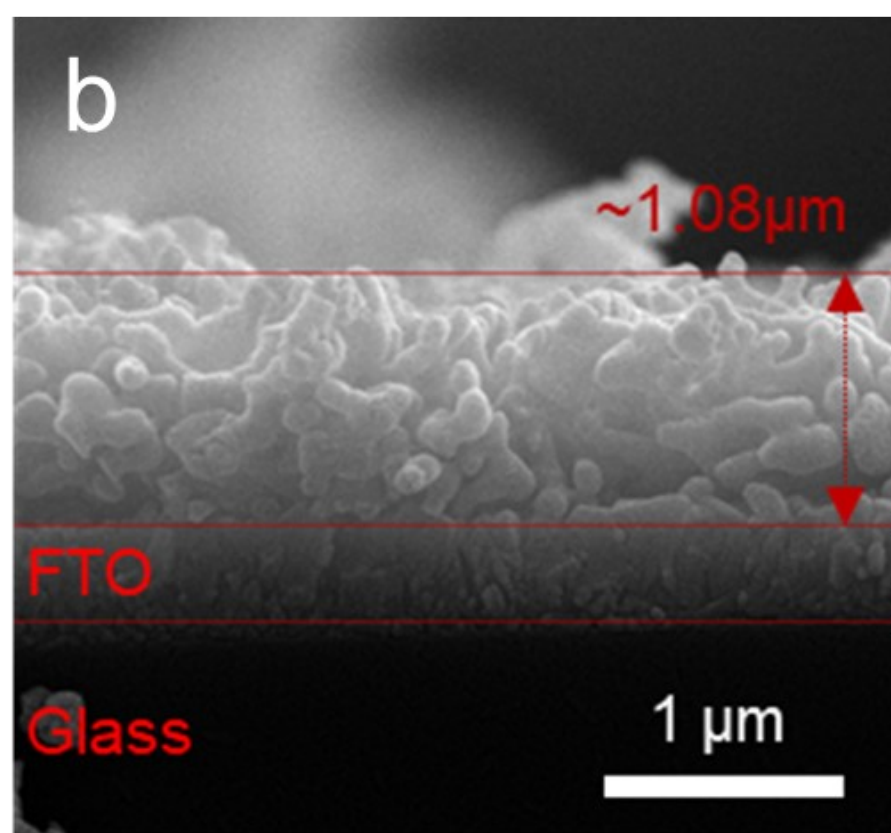

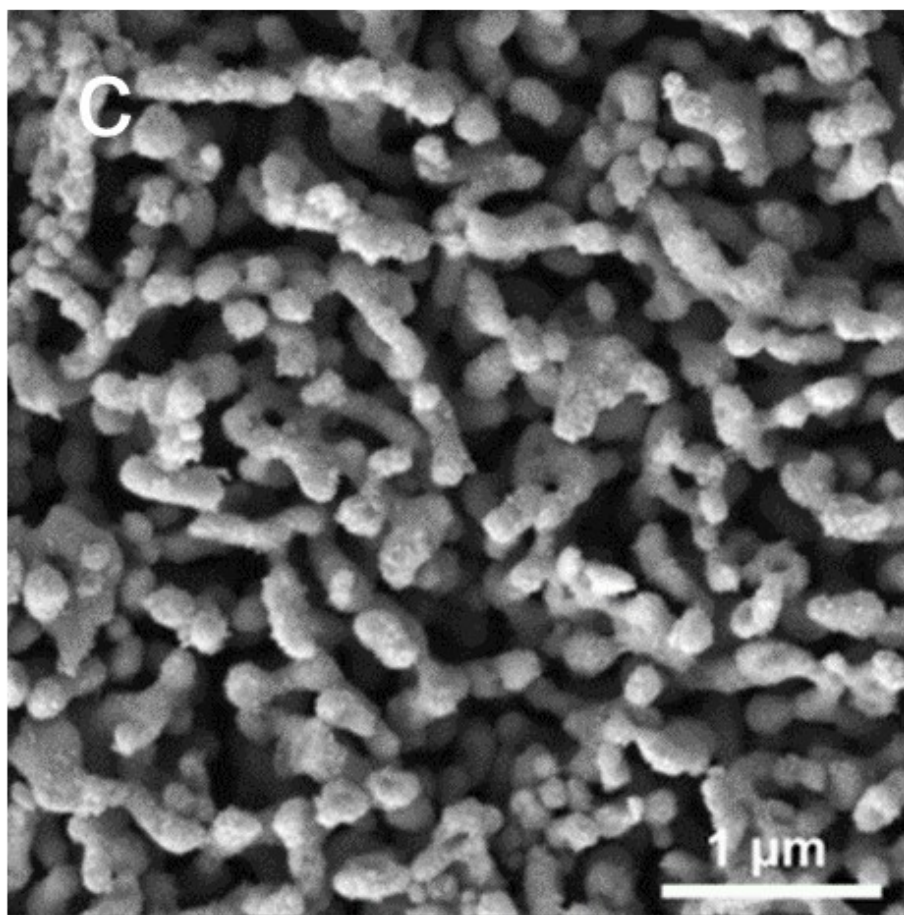

**Fig. S1** The SEM images of (a, b)  $\text{BiVO}_4$  and (c)  $\text{Co}_2\text{Fe}_1\text{-LDHs/BiVO}_4$ .

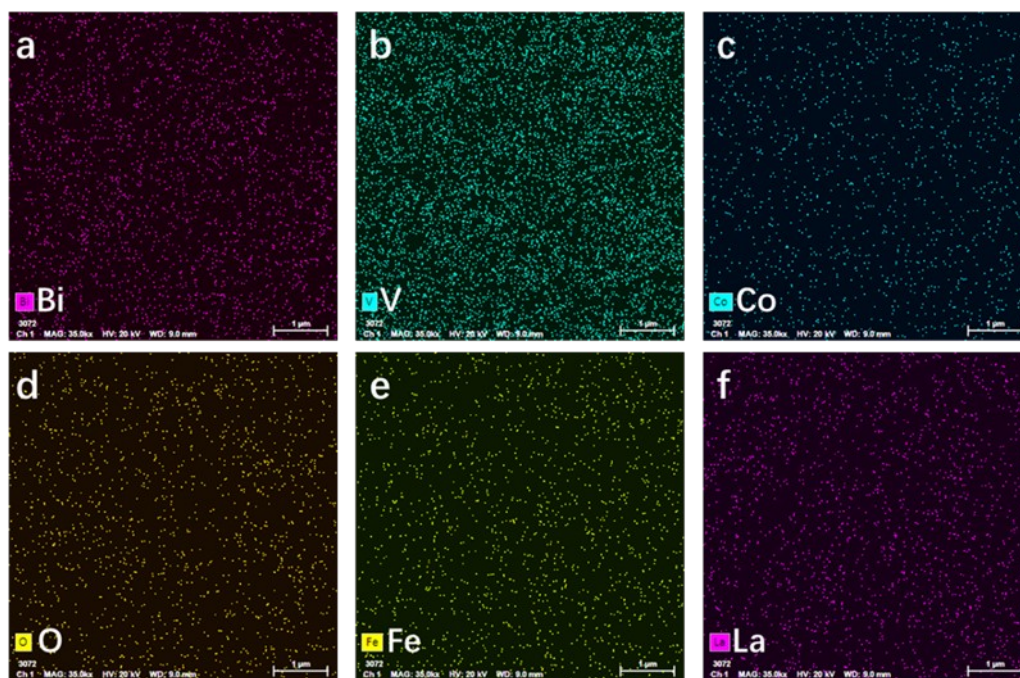

**Fig. S2** The corresponding SEM-EDS mapping images of  $\text{Co}_2\text{Fe}_{0.2}\text{La}_{0.8}\text{-LDHs/BiVO}_4$ .

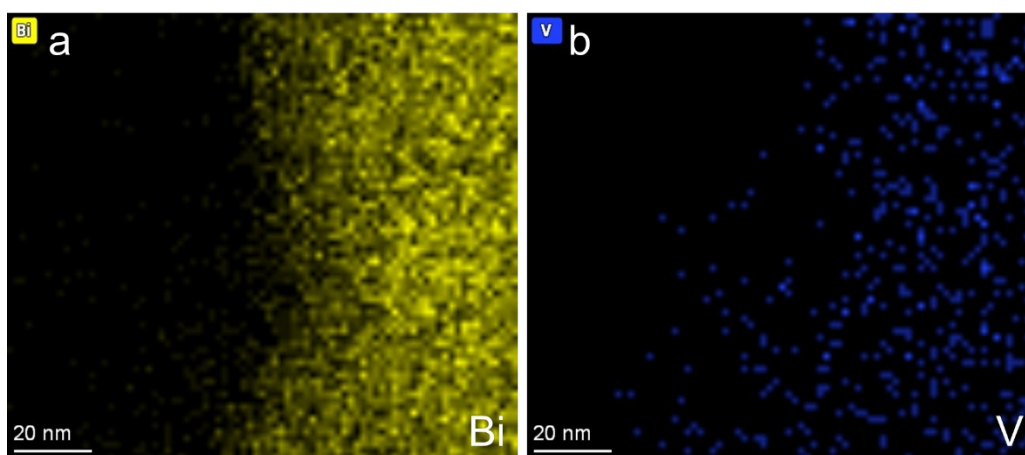

**Fig. S3** The corresponding EDS mapping images of  $\text{Co}_2\text{Fe}_{0.2}\text{La}_{0.8}\text{-LDHs/BiVO}_4$ .

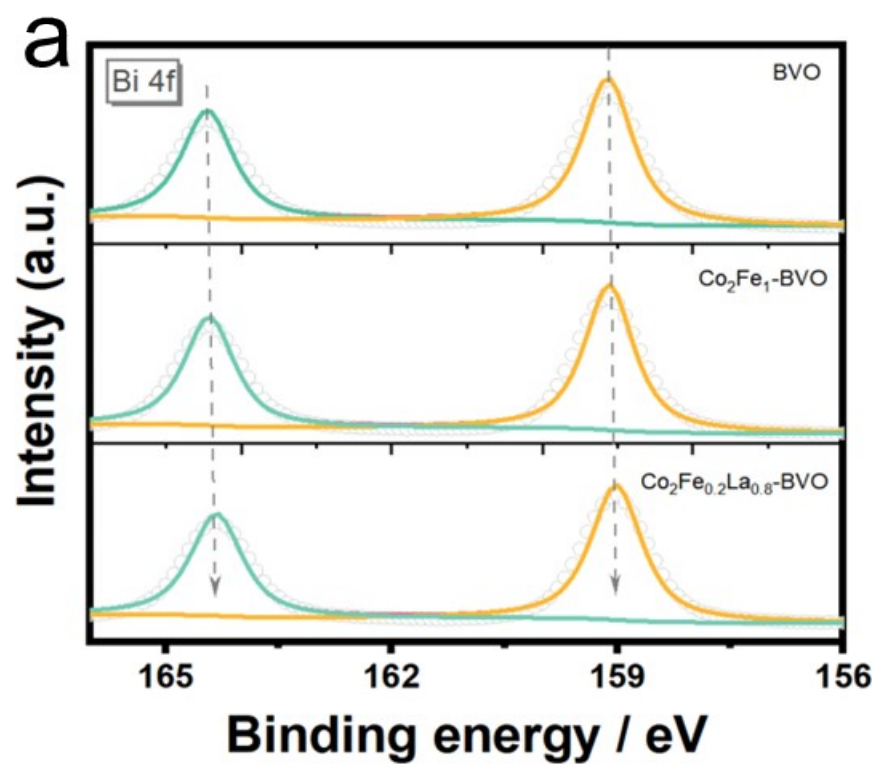

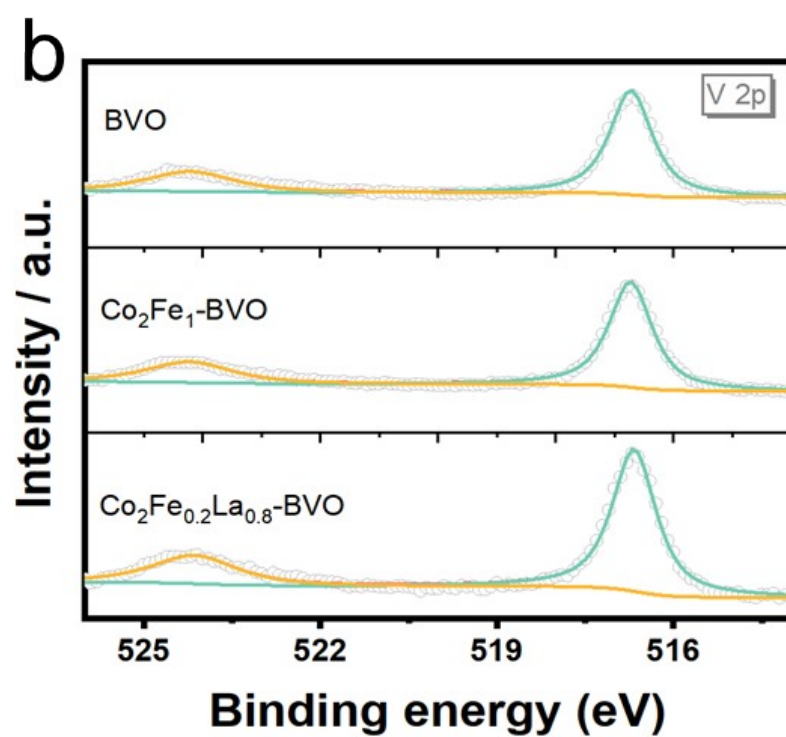

**Fig. S4** XPS spectra of  $\text{BiVO}_4$ ,  $\text{Co}_2\text{Fe}_1\text{-LDHs/BiVO}_4$  and  $\text{Co}_2\text{Fe}_{0.2}\text{La}_{0.8}\text{-LDHs/BiVO}_4$ :

(a) Bi 4f, (b) V 2p.

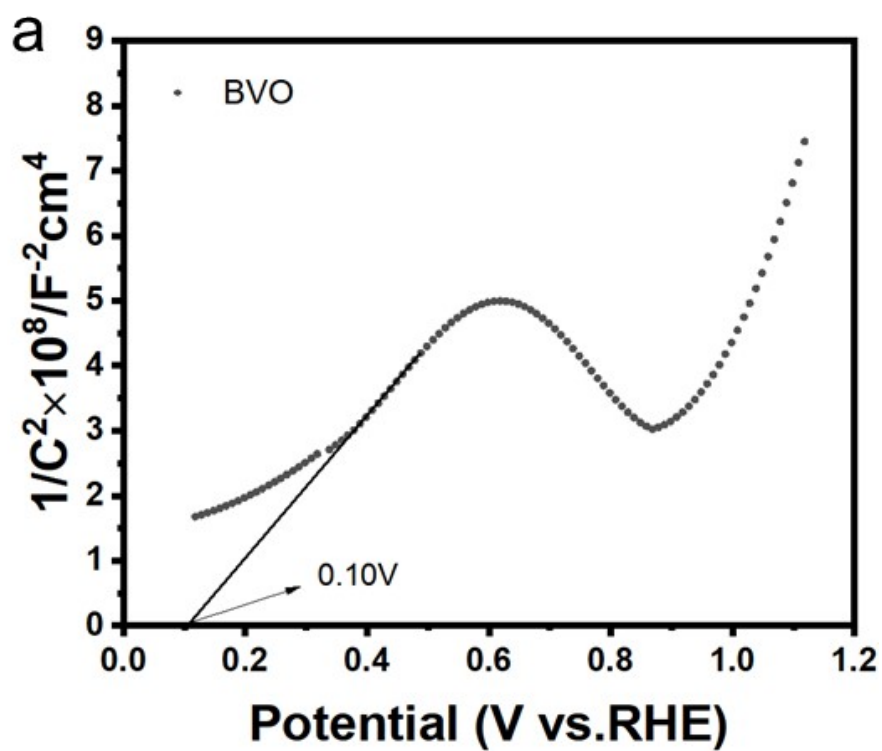

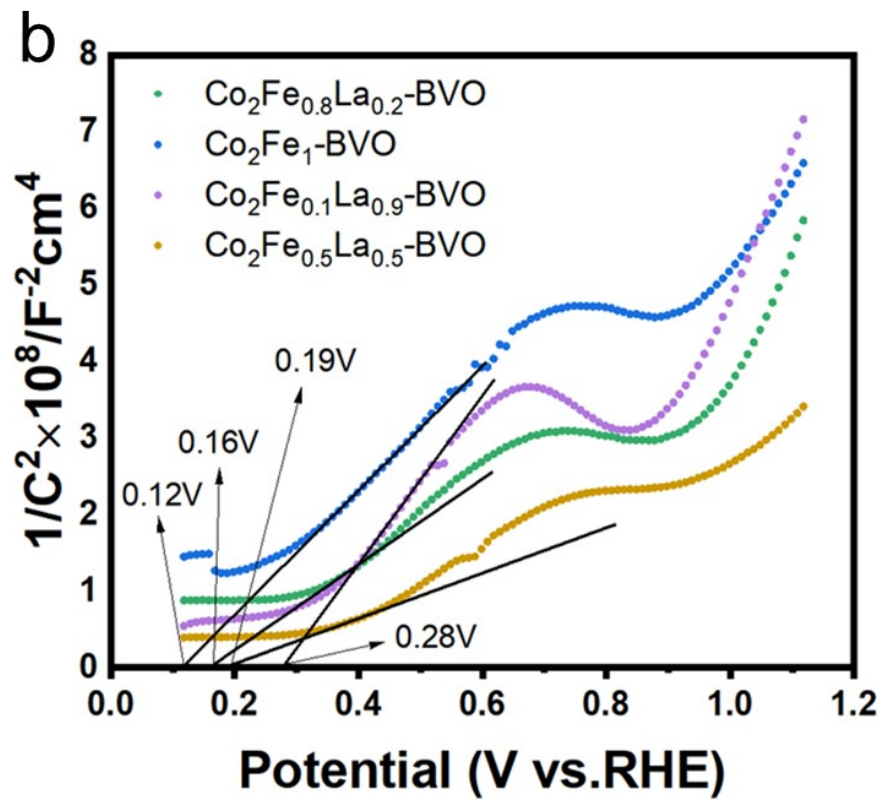

Fig. S5 Mott Schottky (MS) curves of (a)  $\text{BiVO}_4$ , and (b)  $\text{Co}_2\text{Fe}_x\text{La}_{1-x}\text{-LDHs/BiVO}_4$ .

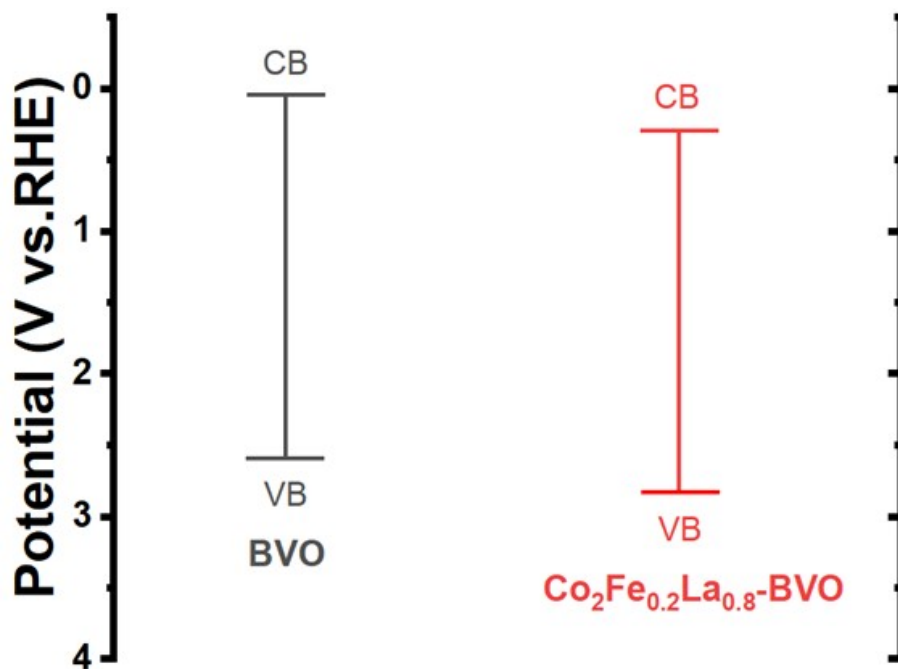

Fig. S6 Band structures of  $\text{BiVO}_4$  and  $\text{Co}_2\text{Fe}_{0.2}\text{La}_{0.8}\text{-LDHs/BiVO}_4$ .

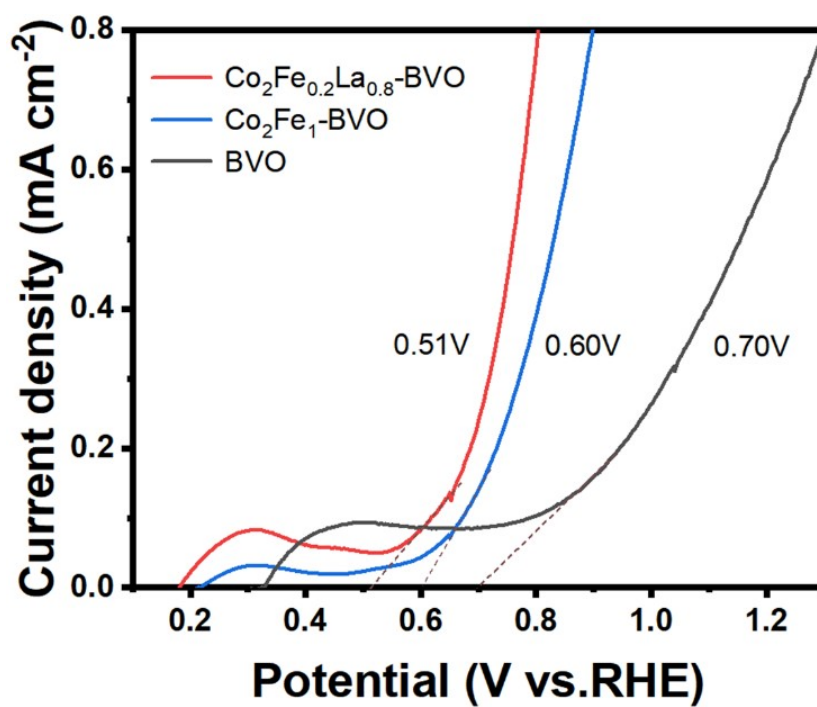

**Fig. S7** Onset potentials of BiVO<sub>4</sub>, Co<sub>2</sub>Fe<sub>1</sub>-LDHs/BiVO<sub>4</sub> and Co<sub>2</sub>Fe<sub>0.2</sub>La<sub>0.8</sub>-LDHs/BiVO<sub>4</sub>.

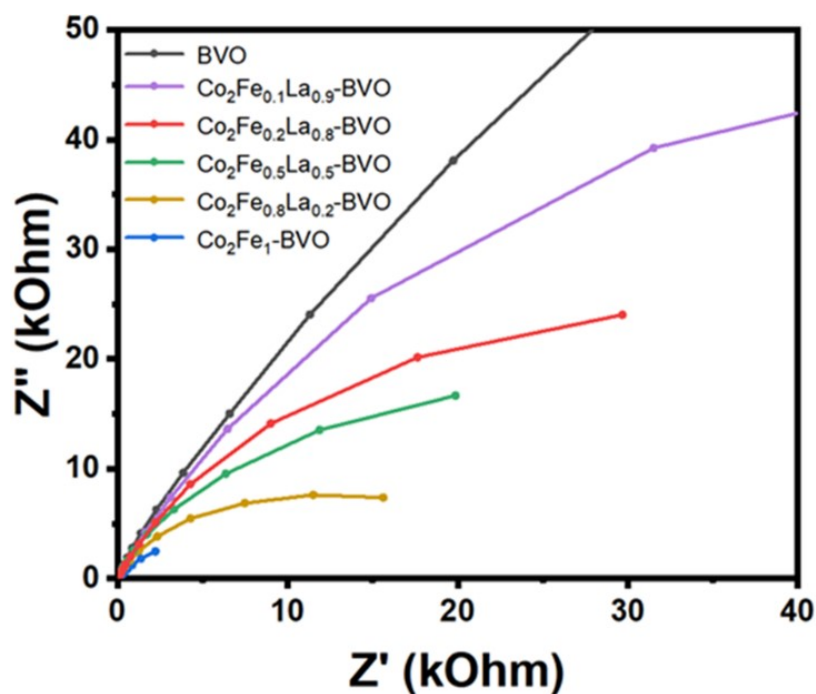

**Fig. S8** EIS under dark irradiation of BiVO<sub>4</sub>, Co<sub>2</sub>Fe<sub>1</sub>-LDHs/BiVO<sub>4</sub> and Co<sub>2</sub>Fe<sub>x</sub>La<sub>1-x</sub>-LDHs/BiVO<sub>4</sub>.

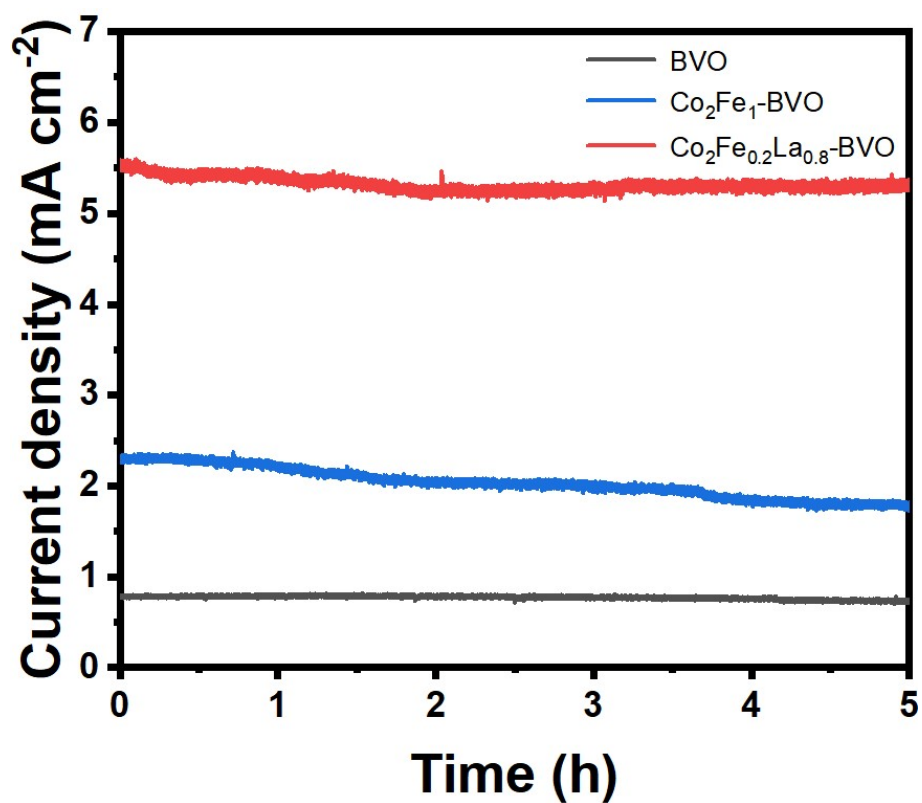

**Fig. S9** I-t curves for BiVO<sub>4</sub>, Co<sub>2</sub>Fe<sub>1</sub>-LDHs/BiVO<sub>4</sub> and Co<sub>2</sub>Fe<sub>0.2</sub>La<sub>0.8</sub>-LDHs/BiVO<sub>4</sub> photoanodes under continuous illumination at 0.6 V vs. RHE for 5h.

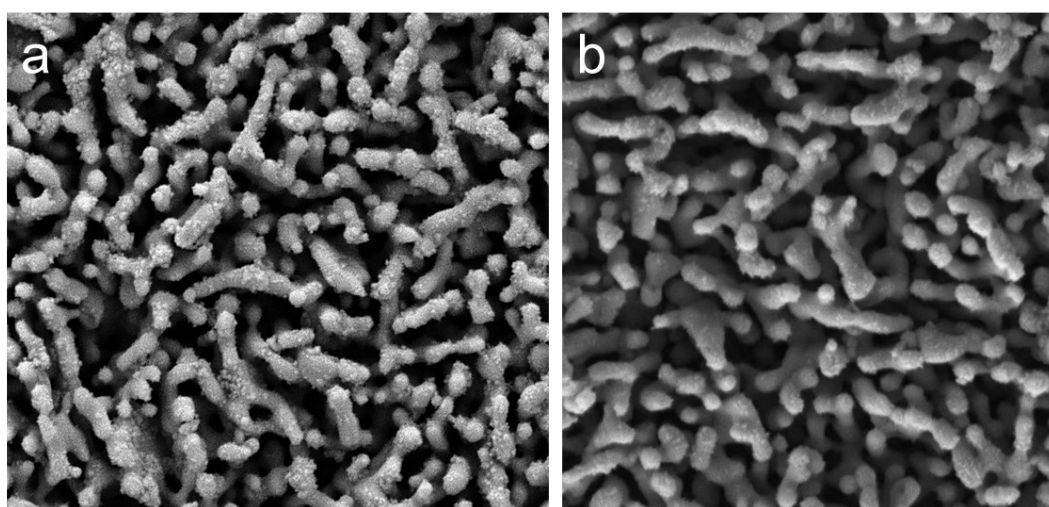

**Fig. S10** The SEM images of Co<sub>2</sub>Fe<sub>0.2</sub>La<sub>0.8</sub>-LDHs/BiVO<sub>4</sub> catalyst (a) before and (b) after reaction.

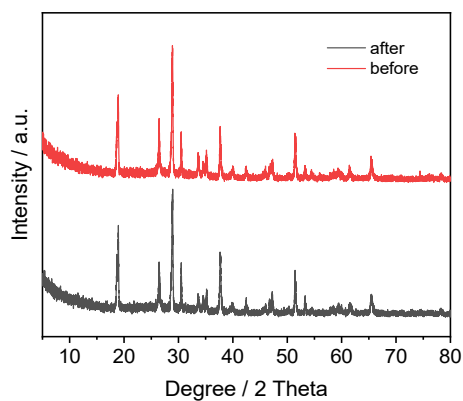

**Figure S11.** XRD patterns of  $\text{Co}_2\text{Fe}_{0.2}\text{La}_{0.8}\text{-LDHs/BiVO}_4$  catalyst (a) before and (b) after reaction.

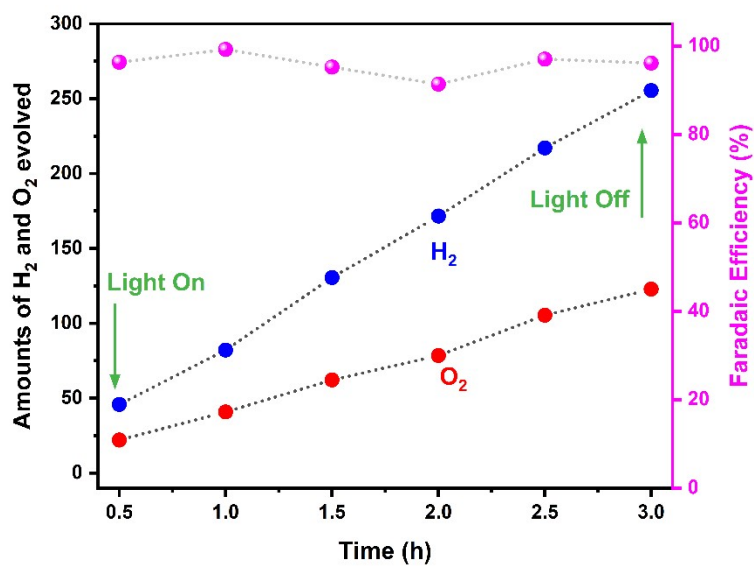

**Fig. S12** Evolved  $\text{H}_2/\text{O}_2$  amounts and FE over time during 3 h on  $\text{Co}_2\text{Fe}_{0.2}\text{La}_{0.8}\text{-LDHs/BiVO}_4$  photoanode

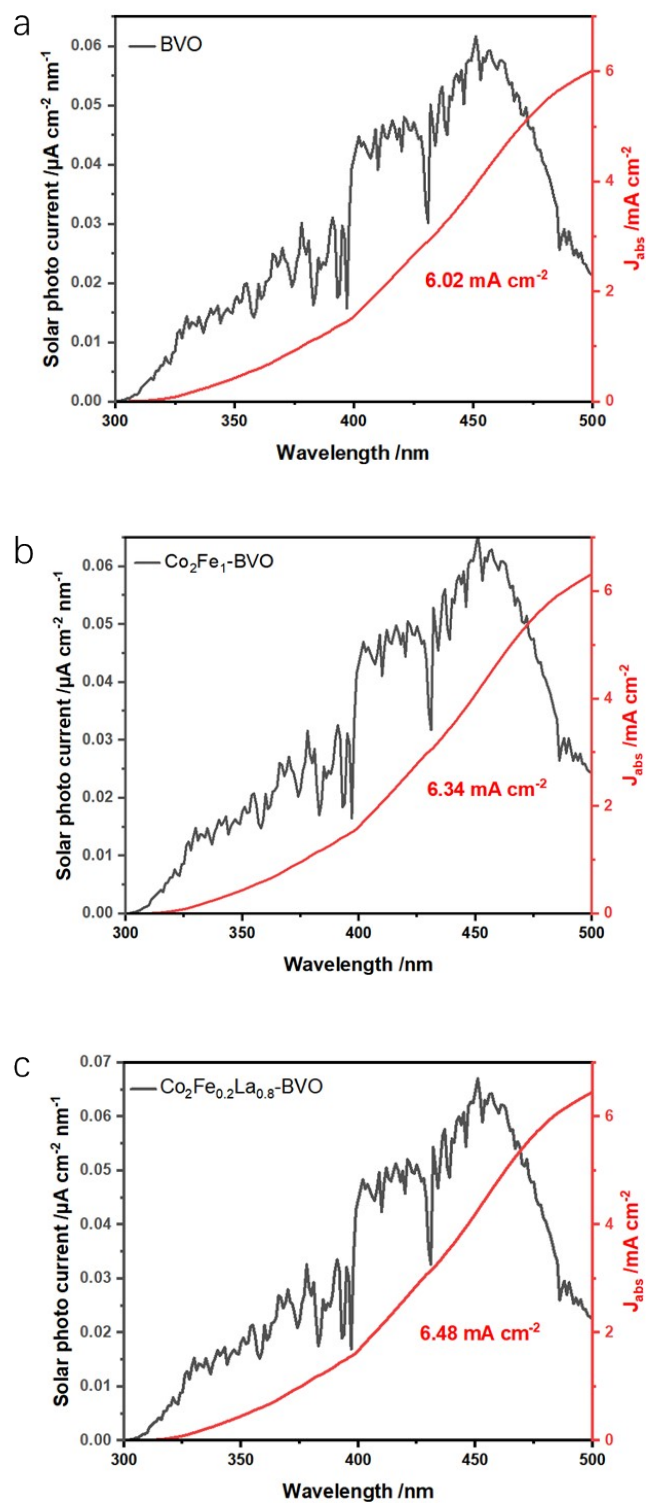

**Fig. S13** Estimated solar photocurrent and integrated photocurrent of (a) BiVO<sub>4</sub>, (b) Co<sub>2</sub>Fe<sub>1</sub>-LDHs/BiVO<sub>4</sub>, and (c) Co<sub>2</sub>Fe<sub>0.2</sub>La<sub>0.8</sub>-LDHs/BiVO<sub>4</sub>.

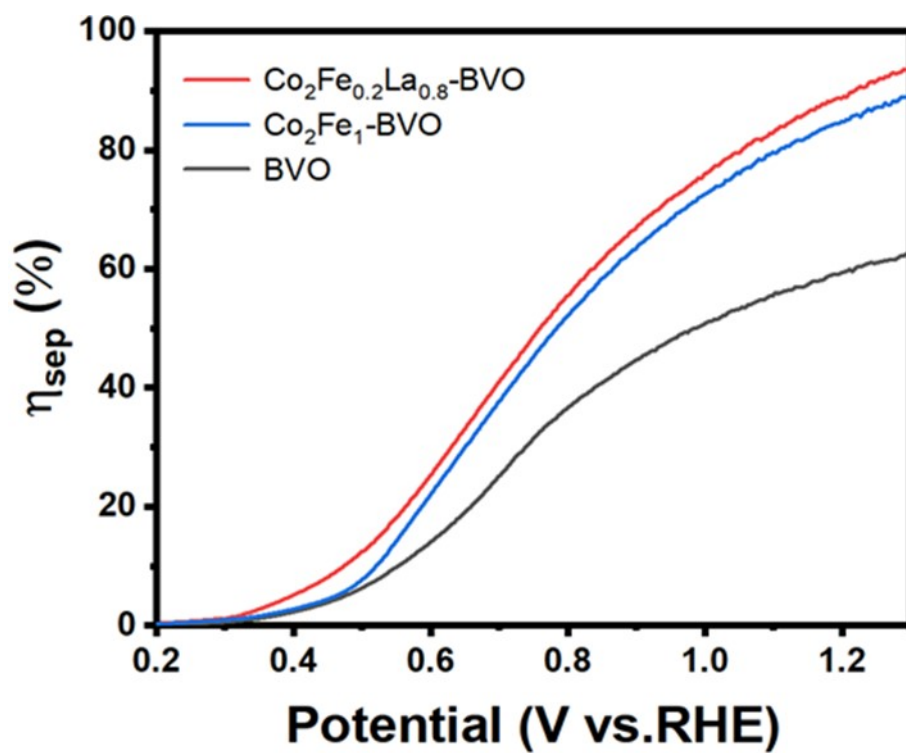

**Fig. S14** Charge separation efficiencies  $\text{BiVO}_4$ ,  $\text{Co}_2\text{Fe}_1\text{-LDHs/BiVO}_4$  and  $\text{Co}_2\text{Fe}_{0.2}\text{La}_{0.8}\text{-LDHs/BiVO}_4$ .

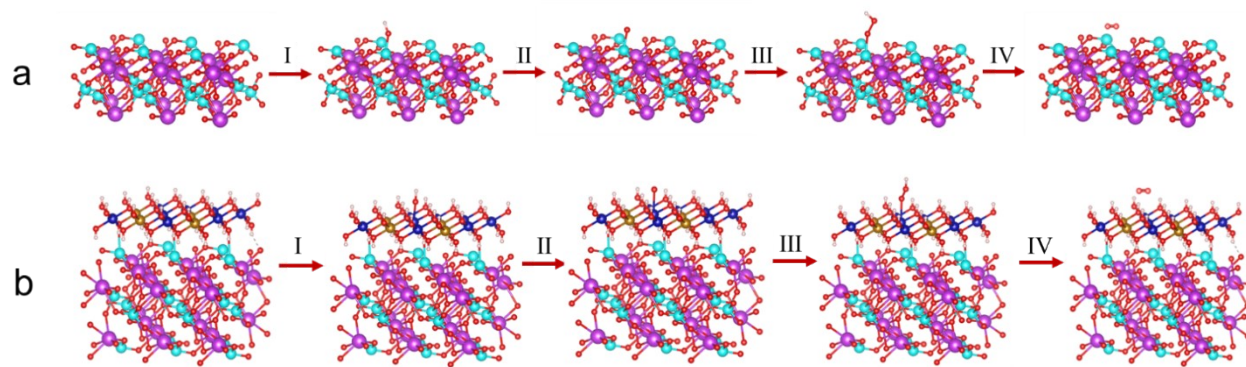

**Fig. S15** Reaction steps of (a)  $\text{BiVO}_4$  and (b)  $\text{Co}_2\text{Fe}_1\text{-BiVO}_4$  with Co elements as active sites.

**Table S1.** The relative proportions of  $\text{Fe}^{3+}$  and  $\text{Fe}^{2+}$  in  $\text{Co}_2\text{Fe}_1\text{-LDHs/BiVO}_4$  and  $\text{Co}_2\text{Fe}_{0.2}\text{La}_{0.8}\text{-LDHs/BiVO}_4$ .

| Photoanodes                                               | Peak area of $\text{Fe}^{3+}$ | Peak area of $\text{Fe}^{2+}$ | Relative ratio of $\text{Fe}^{3+}/\text{Fe}^{2+}$ |
|-----------------------------------------------------------|-------------------------------|-------------------------------|---------------------------------------------------|
| $\text{Co}_2\text{Fe}_1\text{-BiVO}_4$                    | 35251                         | 44247                         | 0.797                                             |
| $\text{Co}_2\text{Fe}_{0.2}\text{La}_{0.8}\text{-BiVO}_4$ | 49750                         | 33801                         | 1.470                                             |

**Table S2.** The relative proportions of  $\text{Co}^{3+}$  and  $\text{Co}^{2+}$  in  $\text{Co}_2\text{Fe}_1\text{-LDHs/BiVO}_4$  and  $\text{Co}_2\text{Fe}_{0.2}\text{La}_{0.8}\text{-LDHs/BiVO}_4$ .

| Photoanodes                                               | Peak area of $\text{Co}^{3+}$ | Peak area of $\text{Co}^{2+}$ | Relative ratio of $\text{Co}^{3+}/\text{Co}^{2+}$ |
|-----------------------------------------------------------|-------------------------------|-------------------------------|---------------------------------------------------|
| $\text{Co}_2\text{Fe}_1\text{-BiVO}_4$                    | 17502                         | 19892                         | 0.880                                             |
| $\text{Co}_2\text{Fe}_{0.2}\text{La}_{0.8}\text{-BiVO}_4$ | 17639                         | 14141                         | 1.240                                             |

**Table S3.** The relative proportions of  $\text{BiVO}_4$ ,  $\text{Co}_2\text{Fe}_1\text{-LDHs/BiVO}_4$  and  $\text{Co}_2\text{Fe}_{0.2}\text{La}_{0.8}\text{-LDHs/BiVO}_4$ .

| Photoanode                                                | Peak area of lattice oxygen ( $\text{O}_\text{L}$ ) | Peak area of oxygen vacancy ( $\text{O}_\text{V}$ ) | Relative ratio of $\text{O}_\text{V}/\text{O}_\text{L}$ |
|-----------------------------------------------------------|-----------------------------------------------------|-----------------------------------------------------|---------------------------------------------------------|
| $\text{BiVO}_4$                                           | 145663.9                                            | 50861.21                                            | 0.349                                                   |
| $\text{Co}_2\text{Fe}_1\text{-BiVO}_4$                    | 123756.07                                           | 77179.26                                            | 0.624                                                   |
| $\text{Co}_2\text{Fe}_{0.2}\text{La}_{0.8}\text{-BiVO}_4$ | 97817.86                                            | 110807.1                                            | 1.133                                                   |

**Table S4.** Nd of BiVO<sub>4</sub>, Co<sub>2</sub>Fe<sub>1</sub>-LDHs/BiVO<sub>4</sub> and Co<sub>2</sub>Fe<sub>x</sub>La<sub>1-x</sub>-LDHs/BiVO<sub>4</sub>.

| Photoanode                                                             | Nd/10 <sup>18</sup> cm <sup>-3</sup> |
|------------------------------------------------------------------------|--------------------------------------|
| BiVO <sub>4</sub>                                                      | 6.1                                  |
| Co <sub>2</sub> Fe <sub>1</sub> -LDHs/BiVO <sub>4</sub>                | 9.5                                  |
| Co <sub>2</sub> Fe <sub>0.8</sub> La <sub>0.2</sub> /BiVO <sub>4</sub> | 5.7                                  |
| Co <sub>2</sub> Fe <sub>0.5</sub> La <sub>0.5</sub> /BiVO <sub>4</sub> | 3.5                                  |
| Co <sub>2</sub> Fe <sub>0.2</sub> La <sub>0.8</sub> /BiVO <sub>4</sub> | 7.9                                  |
| Co <sub>2</sub> Fe <sub>0.1</sub> La <sub>0.9</sub> /BiVO <sub>4</sub> | 11.0                                 |

**Table S5.** Comparison of photo-electrochemical performance on BiVO<sub>4</sub>-based photocatalysts.

| Photo-catalyst                                                                  | Current density under 1.23 V vs. RHE /<br>mA cm <sup>-2</sup> | Reference        |
|---------------------------------------------------------------------------------|---------------------------------------------------------------|------------------|
| LaCo(OH) <sub>x</sub> /BiVO <sub>4</sub>                                        | 2.02                                                          | 7                |
| Co/La BiVO <sub>4</sub>                                                         | 3.65                                                          | 8                |
| NiFe-LDH/F-BiVO <sub>4</sub>                                                    | 2.67                                                          | 9                |
| La <sub>0.3</sub> Co <sub>0.1</sub> Ce <sub>0.6</sub> /BiVO <sub>4</sub>        | 3                                                             | 10               |
| Co <sub>2</sub> Fe <sub>0.2</sub> La <sub>0.8</sub> -<br>LDHs/BiVO <sub>4</sub> | 5.8                                                           | <b>This work</b> |

**Table S6.** The  $R_s$  and  $R_{ct}$  values of sample  $\text{BiVO}_4$ ,  $\text{Co}_2\text{Fe}_1\text{-LDHs/BiVO}_4$ , and  $\text{Co}_2\text{Fe}_{0.2}\text{La}_{0.8}\text{-LDHs/BiVO}_4$

| Sample                                                         | $R_s$ ( $\Omega$ ) | $R_{ct}$ ( $\text{k}\Omega$ ) |
|----------------------------------------------------------------|--------------------|-------------------------------|
| $\text{BiVO}_4$                                                | 11.25              | 18.45                         |
| $\text{Co}_2\text{Fe}_1\text{-LDHs/BiVO}_4$                    | 9.39               | 6.53                          |
| $\text{Co}_2\text{Fe}_{0.2}\text{La}_{0.8}\text{-LDHs/BiVO}_4$ | 10.88              | 1.13                          |

**Table S7.** The energy barriers of each OER pathway.

|                                                           | U (V) | Step 1 | Step 2 | Step 3 | Step 4 |
|-----------------------------------------------------------|-------|--------|--------|--------|--------|
| $\text{BiVO}_4$                                           | 0     | 0.89   | 0.93   | 2.11   | 0.99   |
|                                                           | 1.23  | -0.34  | -0.30  | 0.88   | -0.24  |
| $\text{Co}_2\text{Fe}_1/\text{BiVO}_4$                    | 0     | 1.12   | 1.30   | 1.80   | 0.70   |
|                                                           | 1.23  | -0.11  | 0.07   | 0.57   | -0.53  |
| $\text{Co}_2\text{Fe}_{0.2}\text{La}_{0.8}/\text{BiVO}_4$ | 0     | 0.51   | 1.52   | 1.66   | 1.23   |
|                                                           | 1.23  | -0.72  | 0.29   | 0.43   | 0      |

## References

- [1] Kresse, G.; Furthmüller, J. Efficiency of Ab-Initio Total Energy Calculations for Metals and Semiconductors Using a Plane-Wave Basis Set. *Comput. Mater. Sci.* 6 (1996) 15–50.
- [2] Kresse, G.; Furthmüller, J. Efficient Iterative Schemes for Ab initio Total-Energy Calculations Using a Plane-Wave Basis Set. *Phys. Rev. B* 54 (1996) 11169–11186.
- [3] Perdew, J. P.; Burke, K.; Ernzerhof, M. Generalized Gradient Approximation Made Simple. *Phys. Rev. Lett.* 77 (1996) 3865–3868.
- [4] Kresse, G.; Joubert, D. From ultrasoft pseudopotentials to the Projector Augmented-Wave Method. *Phys. Rev. B* 59 (1999) 1758-1775.
- [5] Blöchl, P. E. Projector Augmented-Wave Method. *Phys. Rev. B* 50 (1994) 17953–17979.
- [6] Henkelman, G.; Uberuaga, B. P.; Jonsson, H. A Climbing Image Nudged Elastic Band Method for Finding Saddle Points and Minimum Energy. Paths *J. Chem. Phys.* 113 (2000) 9901.
- [7] Chhetri M, Dey S, Rao C N R. Photoelectrochemical Oxygen Evolution Reaction Activity of Amorphous Co–La Double Hydroxide-BiVO<sub>4</sub> Fabricated by Pulse Plating Electrodeposition. *ACS Energy Lett.* 2 (2017) 1062-1069.
- [8] Geng H, Huang S, Kong D, *et al.* A novel synergy of Co/La Co-Doped Porous BiVO<sub>4</sub> Photoanodes with Enhanced Photoelectrochemical Solar Water Splitting Performance. *J. Alloys Compd.* 925 (2022) 166667.

- [9] Liu J, Li J, Li Y, *et al.* Photoelectrochemical Water Splitting Coupled with Degradation of Organic Pollutants Enhanced by Surface and Interface Engineering of BiVO<sub>4</sub> Photoanode. *Appl. Catal. B*, 278 (2020) 119268.
- [10] Guevarra D, Shinde A, Suram S K, *et al.* Development of Solar Fuels Photoanodes through Combinatorial Integration of Ni–La–Co–Ce Oxide Catalysts on BiVO<sub>4</sub>. *Energy Environ. Sci.* 9 (2016) 565-580.
